# Supplementary material for: Color tuning of di-boron derived TADF emitters: molecular design and property prediction
Source: Royal Society of Chemistry journal article supplement (doi:10.1039/d1tc03345j), 2021-01-01

## Supporting Information

### **Color tuning of di-boron derived TADF emitters: molecular design and property prediction**

Jiaqi Li, Fei Zhao, Yanan Chen, Mingfan Zhang, Tingyu Li, and Houyu Zhang\*

*State key laboratory of supramolecular structure and materials,*

*Institute of theoretical chemistry, College of Chemistry, Jilin university,*

*Changchun 130012, P.R. China*

\*Email: [hoyuzhang@jlu.edu.cn](mailto:hoyuzhang@jlu.edu.cn)

# Contents

**Table S1** Calculated HOMO energies of molecule **1a** with different DFT functionals.

**Table S2** Calculated absorption and emission wavelengths of **1a** with different DFT functionals.

**Table S3** Calculated AIP and VIP values with PBE0 functional, absorption and emission wavelengths with BMK functional for molecule **1b**.

**Table S4** Calculated HOMO and LUMO of the electron-donating fragments CZ and DMAC.

**Table S5** Calculated HOMO and LUMO of the different electron-withdrawing units.

**Table S6** Calculated absorption excited energies, dominant orbital excitations, oscillator strengths and absorption wavelengths from TD-DFT calculations for the molecules.

**Table S7** Calculated emission energies, dominant orbital excitations, oscillator strengths and emission wavelengths from TD-DFT calculations for the molecules.

**Fig. S1** Schematic diagram of the potential energy surfaces and computational details about TADF.

**Fig. S2** H-H interatomic repulsion effect between donor unit and phenyl group.

**Fig. S3** Structural changes between the optimized structures.

**Fig. S4** Chemical structure and optimized structure of molecule **2a-Me**.

**Fig. S5** Plots of the orbitals involved in the transitions for all molecules.

**Fig. S6** NTO analysis for the  $S_1$  and  $T_n$  excited states for molecules in series **2** and **3**.

**Fig. S7** NTO analysis for molecule **1b** at dihedral angle  $\alpha = 60^\circ$ .

**Fig. S8** Calculated TADF rate constants and NTO analysis for molecule **2a-Me**.

**Fig. S9** Calculated relative energies and oscillator strengths in the  $S_1$  state of molecule **1b** as function of the twisted angles.

**Table S1** Calculated HOMO energies (eV) of molecule **1a** in dichloromethane solution and in gas phase (in parentheses) with different DFT functionals with a fixed percentage of nonlocal Hartree-Fock exchange (**HF<sub>exc</sub>**).

|                         | <b>B3LYP</b>  | <b>PBE0</b>   | <b>BMK</b>    | <b>CAM-B3LYP</b>               | <b>Exptl.<sup>a</sup></b> |
|-------------------------|---------------|---------------|---------------|--------------------------------|---------------------------|
| <b>HF<sub>exc</sub></b> | <b>20%</b>    | <b>25%</b>    | <b>42%</b>    | <b>19% at SR and 65% at LR</b> |                           |
| <b>HOMO</b>             | -5.41 (-5.25) | -5.69 (-5.51) | -6.14 (-5.97) | -6.55 (-6.55)                  | -5.57                     |

<sup>a</sup>From ref 25.

**Table S2** Calculated absorption wavelength ( $\lambda_{\text{abs}}$ ) of molecule **1a** in toluene solution and the emission wavelength ( $\lambda_{\text{em}}$ ) in gas environment with different DFT functionals with a fixed percentage of nonlocal Hartree-Fock exchange (**HF<sub>exc</sub>**).

|                                               | <b>B3LYP</b> | <b>PBE0</b> | <b>BMK</b> | <b>CAM-B3LYP</b>               | <b>Exptl.<sup>a</sup></b> |
|-----------------------------------------------|--------------|-------------|------------|--------------------------------|---------------------------|
| <b>HF<sub>exc</sub></b>                       | <b>20%</b>   | <b>25%</b>  | <b>42%</b> | <b>19% at SR and 65% at LR</b> |                           |
| <b><math>\lambda_{\text{abs}}</math> (nm)</b> | 379          | 359         | 332        | 300                            | 342                       |
|                                               | 564          | 517         | 421        | 362                            | 425                       |
| <b><math>\lambda_{\text{em}}</math> (nm)</b>  | 711          | 638         | 531        | 437                            | 524                       |

<sup>a</sup>From ref 25.

**Table S3** Calculated AIP and VIP (in parentheses) values (eV) with PBE0 functional and calculated  $\lambda_{\text{abs}}$  and  $\lambda_{\text{em}}$  with BMK functional for molecule **1b** in gas phase.

| <b>1b</b>                                     | <b>Calculated values</b> | <b>Exptl.<sup>b</sup></b> |
|-----------------------------------------------|--------------------------|---------------------------|
| <b>AIP (VIP)</b>                              | 5.33 (5.36)              | 5.56                      |
| <b><math>\lambda_{\text{abs}}</math> (nm)</b> | 485                      | 480                       |
| <b><math>\lambda_{\text{em}}</math> (nm)</b>  | 584                      | 587                       |

<sup>b</sup>From ref 26.

**Table S4** Calculated HOMO and LUMO of the electron-donating fragments CZ and DMAC by DFT at the PBE0/6-31G(d, p) level.

| <b>Donor</b> | <b>Structure</b>                                                                    | <b>HOMO</b>                                                                                  | <b>LUMO</b>                                                                                   |
|--------------|-------------------------------------------------------------------------------------|----------------------------------------------------------------------------------------------|-----------------------------------------------------------------------------------------------|
| <b>CZ</b>    | 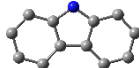 |  -5.73 eV |  -0.56 eV |
| <b>DMAC</b>  |  |  -5.13 eV |  -0.05 eV |

**Table S5** Calculated HOMO and LUMO of the different electron-withdrawing units by DFT at the PBE0/6-31G(d, p) level.

| Acceptor | Structure | HOMO     | LUMO     |
|----------|-----------|----------|----------|
| 1        |           |          |          |
|          |           | -6.39 eV | -2.46 eV |
| 2        |           |          |          |
|          |           | -6.34 eV | -2.07 eV |
| 3        |           |          |          |
|          |           | -6.32 eV | -2.96 eV |

**Table S6** Calculated absorption excited energies, dominant orbital excitations, oscillator strengths and absorption wavelengths from TD-DFT calculations for the molecules in toluene solvent.

| Molecule         | State            | $\Delta E$ (eV)  | Excitation        | $\lambda_{\text{abs}}$ (nm) | $f$    |
|------------------|------------------|------------------|-------------------|-----------------------------|--------|
| <b>1a</b>        | S <sub>1</sub>   | 2.9445           | H → L (83%)       | 421.1                       | 0.0008 |
|                  | S <sub>10</sub>  | 4.0313           | H-11 → L (82%)    | 307.6                       | 0.1764 |
|                  | S <sub>12</sub>  | H → L +3 (45%)   | 286.9             | 0.1936                      |        |
|                  |                  | H-1 → L +2 (44%) |                   |                             |        |
|                  | S <sub>18</sub>  | H → L +4 (42%)   | 261.6             | 1.1354                      |        |
|                  |                  | H-1 → L +5 (40%) |                   |                             |        |
| S <sub>36</sub>  | H-2 → L +4 (29%) | 220.7            | 0.7955            |                             |        |
|                  | H-3 → L +5 (28%) |                  |                   |                             |        |
| <b>1b</b>        | S <sub>1</sub>   | 2.7057           | H → L (100%)      | 458.2                       | 0      |
|                  | S <sub>8</sub>   | 2.5541           | H-1 → L (100%)    | 485.4                       | 0.0001 |
|                  | S <sub>15</sub>  | H-1 → L +5 (40%) | 277.9             | 0.2062                      |        |
|                  |                  | H-1 → L +6 (26%) |                   |                             |        |
|                  | S <sub>28</sub>  | 4.9302           | H-15 → L (95%)    | 251.5                       | 0.6599 |
|                  | S <sub>33</sub>  | 5.3174           | H-10 → L +1 (82%) | 233.2                       | 0.9681 |
| <b>2a</b>        | S <sub>1</sub>   | 3.2917           | H → L (90%)       | 376.7                       | 0.8692 |
|                  | S <sub>4</sub>   | 3.7653           | H-4 → L (93%)     | 329.3                       | 0.2739 |
|                  | S <sub>11</sub>  | H-8 → L (38%)    | 286.0             | 0.6258                      |        |
|                  |                  | H → L +3 (26%)   |                   |                             |        |
|                  | S <sub>24</sub>  | 5.1565           | H-5 → L+1 (80%)   | 240.4                       | 0.5135 |
|                  | S <sub>30</sub>  | H-1 → L +5 (41%) | 232.2             | 0.2641                      |        |
|                  |                  | H-6 → L +1 (28%) |                   |                             |        |
|                  | S <sub>34</sub>  | H → L +9 (34%)   | 226.6             | 0.8163                      |        |
| H-1 → L +8 (32%) |                  |                  |                   |                             |        |

|                 |                 |                |                                                            |             |        |
|-----------------|-----------------|----------------|------------------------------------------------------------|-------------|--------|
| <b>2b</b>       | S <sub>1</sub>  | 2.8738         | H → L (93%)                                                | 431.4       | 0.0038 |
|                 | S <sub>4</sub>  | 3.7360         | H-2 → L (91%)                                              | 331.9       | 0.2924 |
|                 | S <sub>6</sub>  | 4.0706         | H-8 → L (94%)                                              | 304.6       | 1.2396 |
|                 | S <sub>18</sub> | 4.6447         | H → L+8 (46%)<br>H-1 → L+7 (38%)                           | 266.9       | 0.6060 |
|                 | S <sub>32</sub> | 5.1464         | H-4 → L +1 (87%)                                           | 240.9       | 0.5229 |
|                 | S <sub>50</sub> | 5.9466         | H → L +11 (28%)<br>H-7 → L +1 (21%)                        | 208.5       | 0.1280 |
| <b>3a</b>       | S <sub>1</sub>  | 2.3545         | H → L (93%)                                                | 526.6       | 0      |
|                 | S <sub>15</sub> | 3.5286         | H-13 → L (58%)<br>H-21 → L (28%)                           | 351.4       | 0.1923 |
|                 | S <sub>19</sub> | 3.5924         | H-21 → L (54%)<br>H-13 → L +1 (31%)                        | 345.1       | 0.2398 |
|                 | S <sub>40</sub> | 4.3003         | H-1 → L +4 (31%)<br>H → L +5 (29%)                         | 288.3       | 0.3162 |
|                 | S <sub>49</sub> | 4.6351         | H → L +8 (21%)<br>H-3 → L +9 (19%)<br>H-2 → L +10 (19%)    | 267.5       | 2.2638 |
|                 | <b>3b</b>       | S <sub>1</sub> | 2.1612                                                     | H → L (99%) | 573.7  |
| S <sub>14</sub> |                 | 3.4806         | H-12 → L (59%)                                             | 356.2       | 0.0671 |
| S <sub>18</sub> |                 | 3.5883         | H-25 → L +1 (69%)                                          | 345.5       | 0.3043 |
| S <sub>34</sub> |                 | 4.1155         | H-29 → L +1 (60%)                                          | 301.3       | 0.0748 |
| S <sub>50</sub> |                 | 4.4546         | H-2 → L +11 (22%)<br>H-3 → L +10 (21%)<br>H-1 → L +8 (20%) | 278.3       | 0.2700 |

**Table S7** Calculated emission energies, dominant orbital excitations, oscillator strengths and emission wavelengths from TD-DFT calculations for the molecules.

| Molecule  | State          | $\Delta E$ (eV) | Excitation   | $\lambda_{em}$ (nm) | $f$    |
|-----------|----------------|-----------------|--------------|---------------------|--------|
| <b>1a</b> | S <sub>1</sub> | 2.3342          | H → L (90%)  | 531.2               | 0.0013 |
| <b>1b</b> | S <sub>1</sub> | 2.1238          | H → L (100%) | 583.8               | 0.0001 |
| <b>2a</b> | S <sub>1</sub> | 3.0721          | H → L (90%)  | 403.6               | 0.5888 |
| <b>2b</b> | S <sub>1</sub> | 2.5410          | H → L (95%)  | 487.9               | 0.0007 |
| <b>3a</b> | S <sub>1</sub> | 1.8861          | H → L (95%)  | 657.4               | 0.0075 |
| <b>3b</b> | S <sub>1</sub> | 1.6978          | H → L (96%)  | 730.3               | 0.0005 |

**Fig. S1** Schematic diagram of the potential energy surfaces and computational details for  $\Delta E_{ST}$  and reorganization energies.

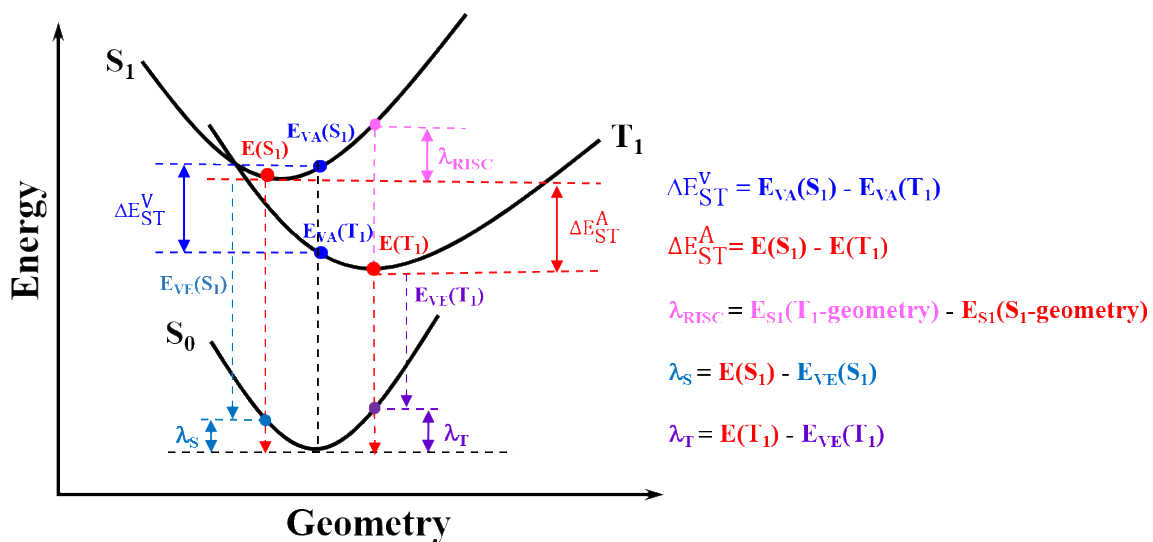

**Fig. S2** H-H interatomic repulsion effect between donor unit and phenyl group.

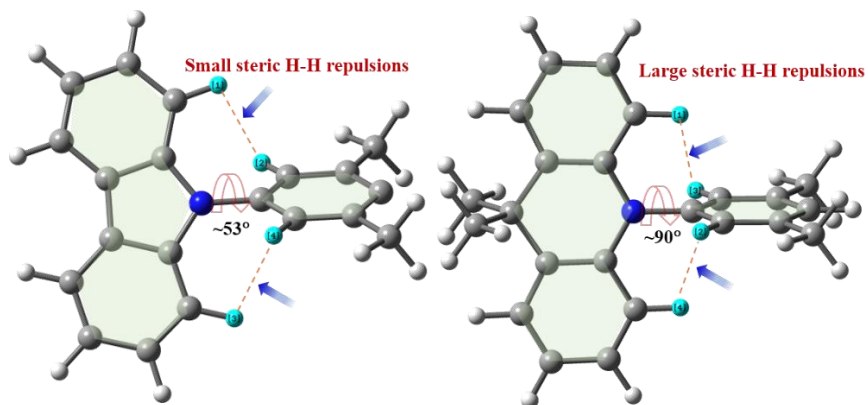

**Fig. S3** Structural changes between the optimized structures of  $S_0$  and  $S_1$ ,  $S_0$  and  $T_1$ , and  $S_1$  and  $T_1$  states ( $S_0$ ,  $S_1$ , and  $T_1$  structures are depicted in grey, red, and blue, respectively).

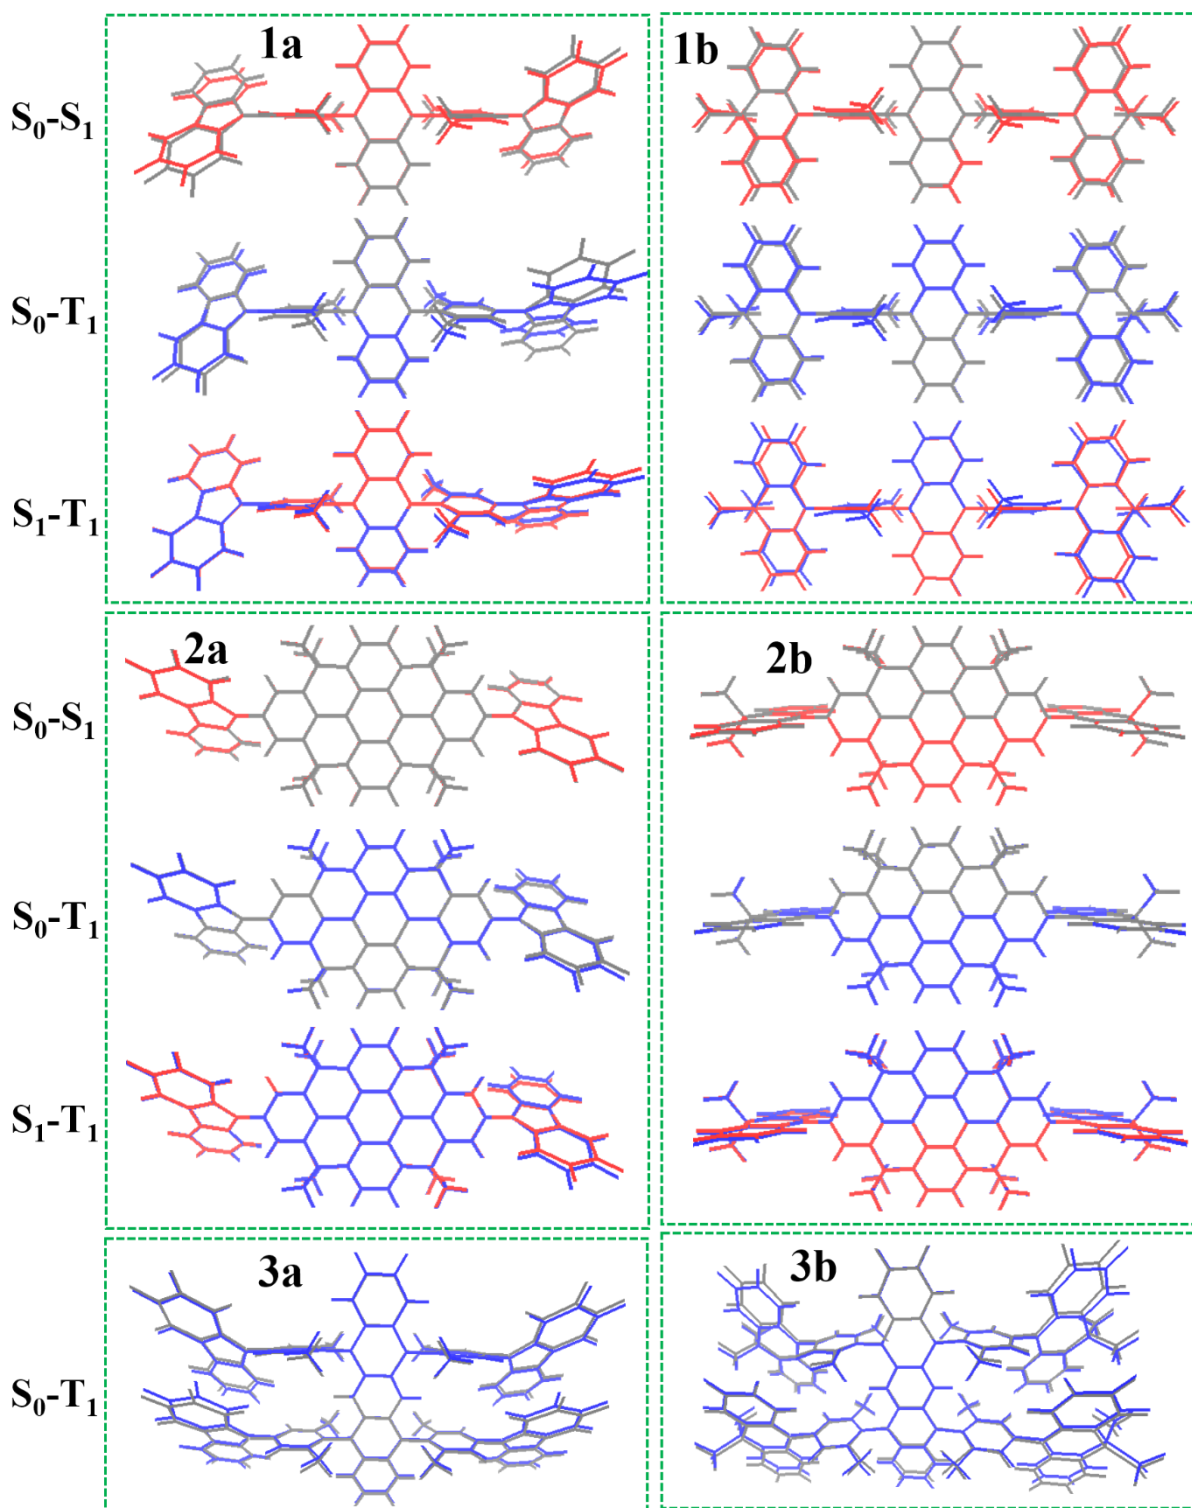

**Fig. S4** Chemical structure (a) and optimized structure (b) of molecule **2a-Me**.

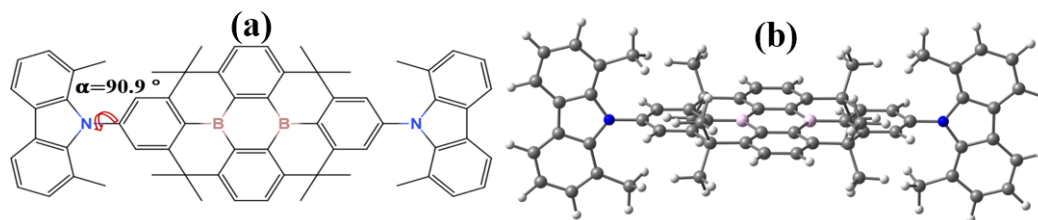

**Fig. S5** Plots of the orbitals involved in the transitions for all molecules calculated at the BMK/6-31G(d, p) level (saturated H atoms are not shown).

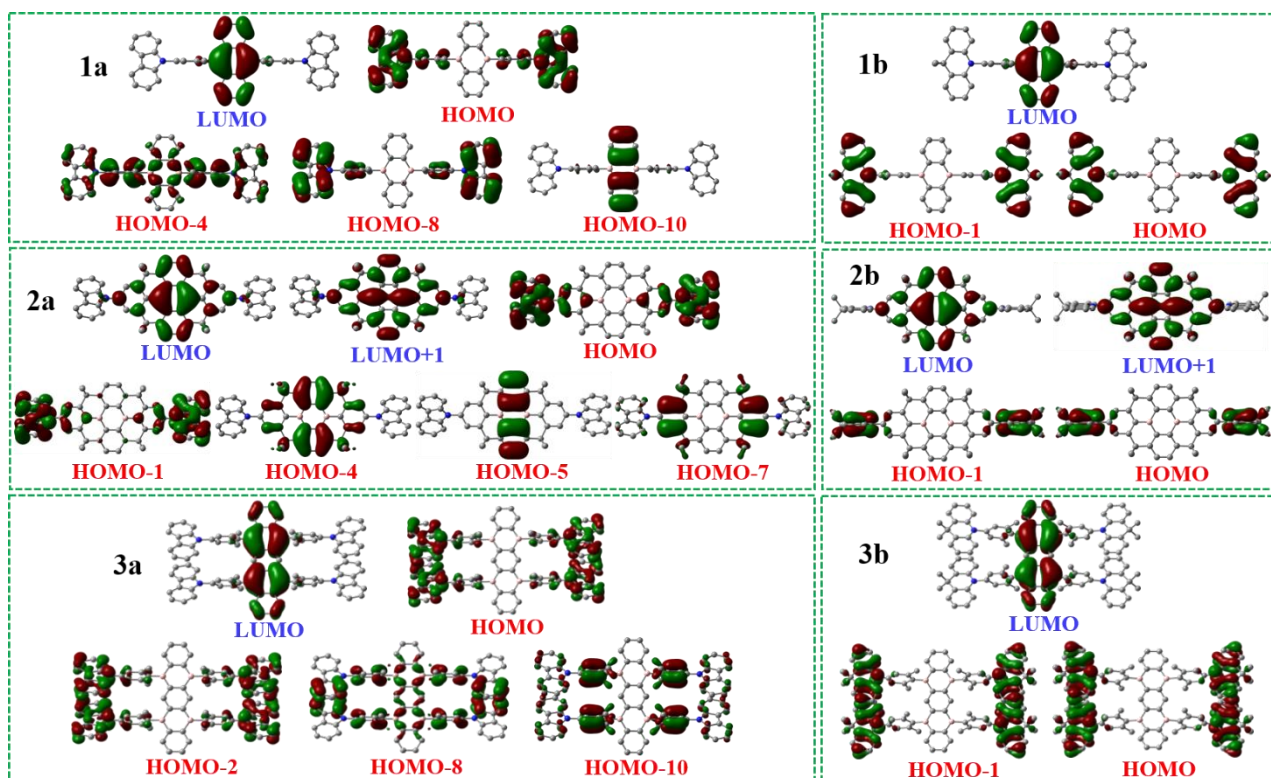



**Fig. S6** NTO analysis for the  $S_1$  and  $T_n$  excited states for molecules in series **2** and **3** (saturated H atoms are not shown).

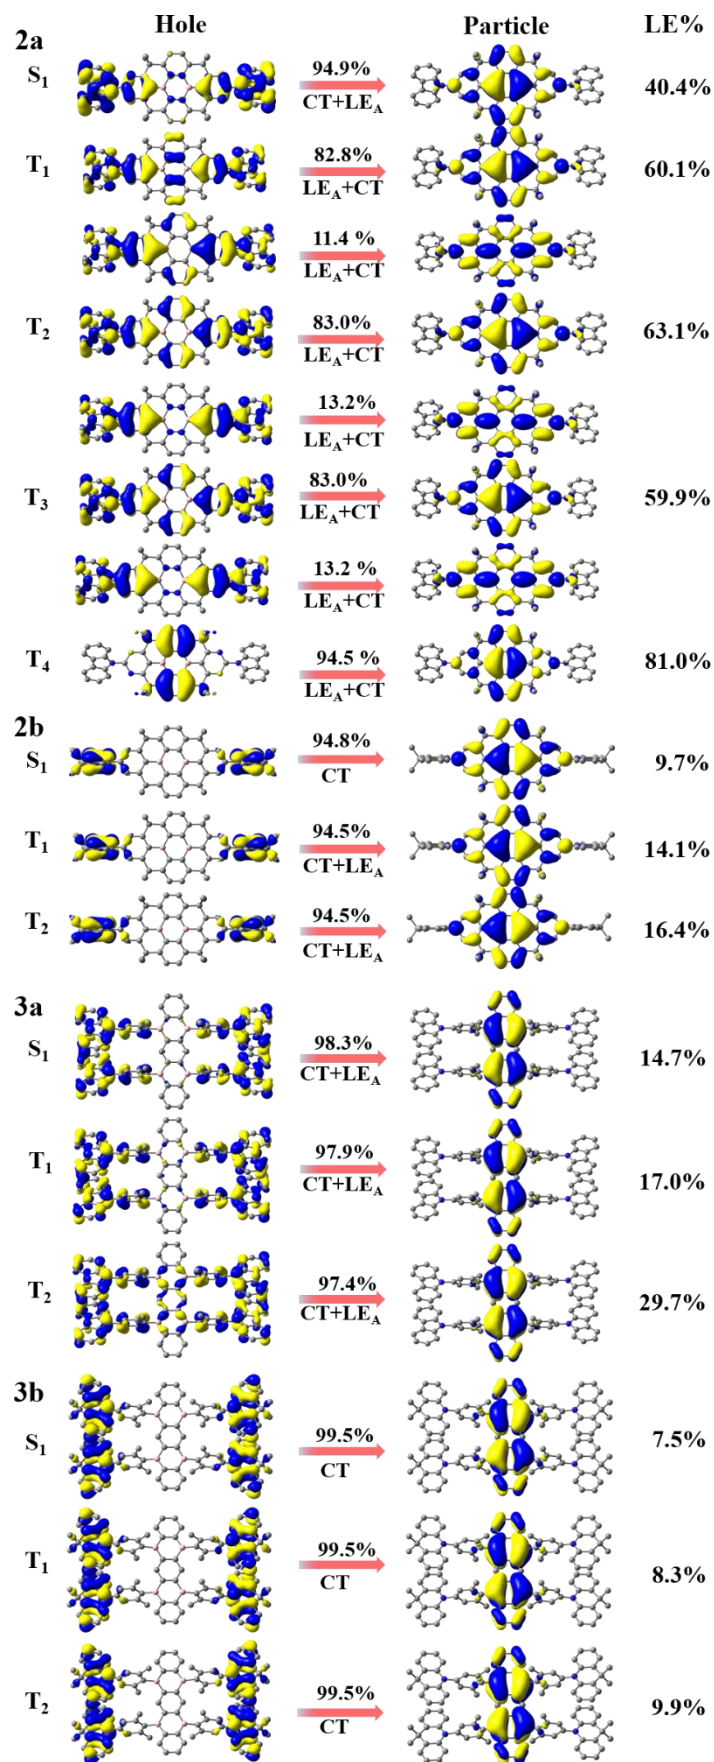

**Fig. S7** NTO analysis for molecule **1b** at dihedral angle  $\alpha = 60^\circ$ .

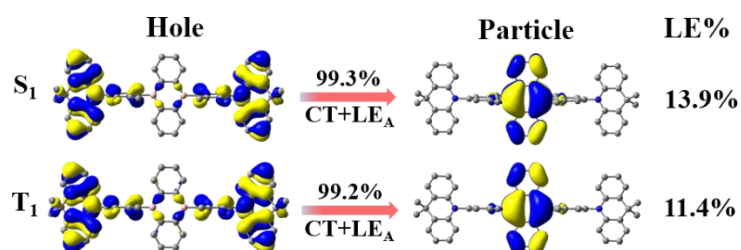

**Fig. S8** Calculated TADF rate constants and NTO analysis for molecule **2a-Me**.

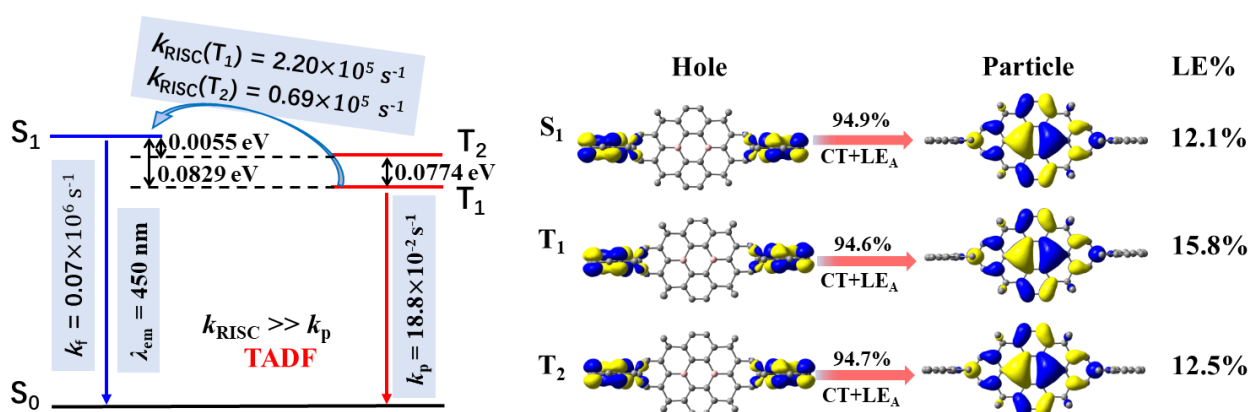

**Fig. S9** Calculated relative energies and oscillator strengths in the  $S_1$  state of molecule **1b** as function of the twisted angles. The blue dashed line labels the thermally activated energy (0.026 eV) at room temperature.

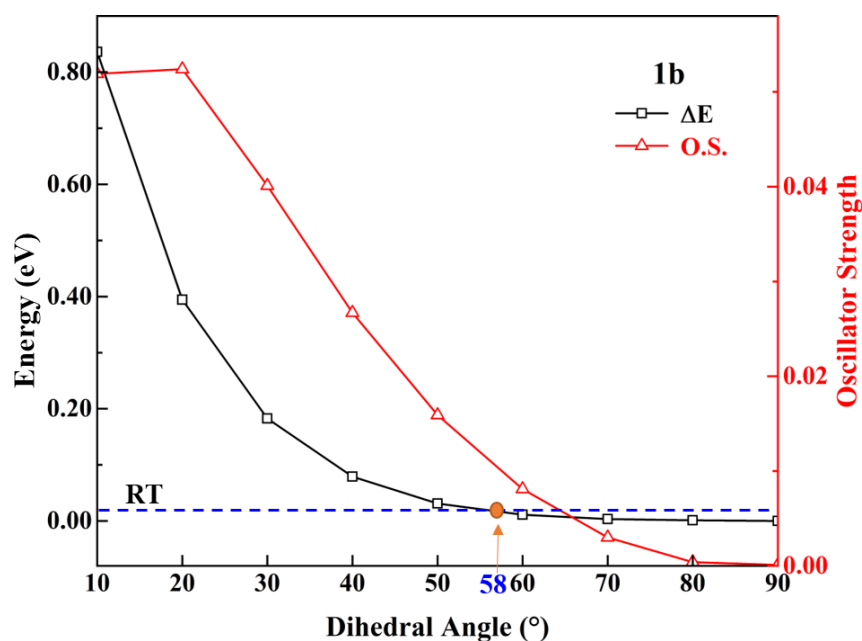

Supplement: d1tc03345j1.pdf [file d1tc03345j1.pdf]
